# Supplementary material for: Improvements in competition performance of track and field athletes following a personalized nutrition intervention: A mixed methods approach
Source: Research Square preprint supplement (doi:10.21203/rs.3.rs-6571056/v1), 2025-05-15
Supplement: Supplementary file 1 [file e83baf184aa8cdd01613b52e.docx]

**Supplementary material 1.**

**A Guide to the Focus Group Discussions**

**Introduction**

Thank you for giving us your valuable time to participate in this discussion. Today, we will be talking about your experiences and perceptions regarding the barriers you faced during the 16-week personalized sports nutrition intervention you recently completed, which is relevant to Sri Lankan athletics. We want to hear your honest opinions—there are no right or wrong answers. Since this is a qualitative study, some questions may change based on your responses. You are free to answer the questions in any way that feels comfortable. You may refuse to answer any question if you do not wish to. If anything is unclear, feel free to ask for clarification. We would also like to record this session, with your consent, so we can revisit unclear points later. We guarantee that everything said will remain confidential.

Please relax, and we hope this session will be both interesting and enjoyable for you.

**Details about the interview**

1. Date:
2. Time:
3. Name of the note taker:
4. Focal group discussion category:
5. Athletes:
6. Coaches:

**Qualitative assessment of the athletes’ and coaches’ perceptions and experience on the 16-week personalized sports nutrition intervention**

**Theme 1:** **Opinions and the experiences on the barriers you encountered when following the 16-week personalized sports nutrition intervention**

Probes

1. What were the advantages and disadvantages you experienced due to the given dietary advice?
2. To what extent were these dietary changes practical for you?
3. Which pieces of advice were you able to follow, and which were not? Please elaborate.
4. Can you tell us about any adverse side effects that you experienced due to the dietary changes, if any?
5. What do you suggest to overcome these drawbacks?

**Theme 2:** **Opinions and perceptions of not achieving the desired outcomes with regards to the body composition tests**

Probes

1. To what extent were you able to follow these prescribed vitamins and supplements?
2. Can you tell us about any problems you encountered while following the prescribed vitamins?
3. Can you tell us about any beneficial effects and/or adverse effects of the prescribed vitamins and supplements?

**Theme 3: Opinions and perceptions of not achieving the desired outcomes with regards to the sports nutrition knowledge scores**

Probes

1. Can you comment on your level of satisfaction with the time allocated for each consultation session?
2. Can you comment on your level of satisfaction with the explanations given during the consultation session?
3. Can you comment on the positive aspects you noticed in the consultation setting?
4. Can you tell us about any negative aspects of the consultation and provide suggestions for improvement?
5. Can you comment on your level of satisfaction with the problems identified, the blood reports, and the scans conducted before the consultation?

**Theme 4: Opinions and thoughts to improve the negative aspects you encountered when following the 16-week personalized sports nutrition intervention**

Probes

1. To what extent was the acquired sports nutrition knowledge helpful in making food choices in your day-to-day life?
2. How did you feel during training in the intervention period? For example, did you experience less tiredness or more energy?
3. Were you able to lift more weight or perform better during the intervention period compared to before the intervention?
4. Were you able to achieve personal and seasonal bests during the intervention period? How do you relate that to the intervention?
5. Can you comment on the frequency of injuries you experienced before and after this sports nutrition intervention?
